# Supplementary material for: Mathematical Model of Mouse Embryonic Cardiomyocyte Excitation–Contraction Coupling
Source: PubMed Central journal article supplement — J Gen Physiol. 2008 Oct;132(4):407–19. doi: 10.1085/jgp.200809961 (PMC2553388; doi:10.1085/jgp.200809961), 2008-10
Supplement: jgp.200809961_3.pdf [file jgp.200809961_3.pdf]

**Korhonen et al,** <http://www.jgp.org/cgi/doi/10.1085/jgp.200809961>

**COMPLETE MODEL EQUATIONS**

The model parameters are defined in Tables S2–S5. The units in the equations are mV for voltage,  $\mu\text{M}$  for concentrations, pl for volume, ms for time,  $\mu\text{m}$  for distance, pA/pF for current, and  $\mu\text{M}/\text{ms}$  (in 1 pl volume) for fluxes. The scaling factors required for agreement of the units are shown within the equations.

**Nernst Potentials**

$$E_{Ca} = \frac{RT}{2F} \ln \frac{[\text{Ca}^{2+}]_o}{[\text{Ca}^{2+}]_{\text{subSL}}} \quad (1)$$

$$E_K = \frac{RT}{F} \ln \frac{[\text{K}^+]_o}{[\text{K}^+]_i} \quad (2)$$

$$E_{Na} = \frac{RT}{F} \ln \frac{[\text{Na}^+]_o}{[\text{Na}^+]_i} \quad (3)$$

**SL Membrane Currents**

*L*-type  $\text{Ca}^{2+}$  Current.

$$I_{CaL} = G_{CaL} O (V - E_{CaL}) \quad (4)$$

$$\alpha = 0.3992 \exp[(V + 12.01)/10.01] \quad (5)$$

$$\beta = 0.04308 \exp[-(V + 13.19)/15.01] + 0.07274 \exp[(V - 17.30)/3.004] \quad (6)$$

$$\gamma = K_{pc,max} [\text{Ca}^{2+}]_{\text{subSL}} / (K_{pc,half} + [\text{Ca}^{2+}]_{\text{subSL}}) \quad (7)$$

$$K_{pcf} = 15.29 \left\{ -\exp[-(V + 24.30)^2 / 87.81] \right\} \quad (8)$$

$$\frac{dO}{dt} = \alpha C_4 - 4\beta O + K_{pcb} I_1 - \gamma O + 0.001(\alpha I_2 - K_{pcf} O) \quad (9)$$

$$C_1 = 1 - (O + C_2 + C_3 + C_4 + I_1 + I_2 + I_3) \quad (10)$$

$$\frac{dC_2}{dt} = 4\alpha C_1 - \beta C_2 + 2\beta C_3 - 3\alpha C_2 \quad (11)$$

$$\frac{dC_3}{dt} = 3\alpha C_2 - 2\beta C_3 + 3\beta C_4 - 2\alpha C_3 \quad (12)$$

$$\frac{dC_4}{dt} = 2\alpha C_3 - 3\beta C_4 + 4\beta O - \alpha C_4 + 0.01(4K_{pcb}\beta I_1 - \alpha\gamma C_4) + 0.002(4\beta I_2 - K_{pcf} C_4) + 4\beta K_{pcb} I_3 - \gamma K_{pcf} C_4 \quad (13)$$

$$\frac{dI_1}{dt} = \gamma O - K_{pcb} I_1 + 0.001(\alpha I_3 - K_{pcf} I_1) + 0.01(\alpha\gamma C_4 - 4\beta K_{pcb} I_1) \quad (14)$$

$$\frac{dI_2}{dt} = 0.001(K_{pcf} O - \alpha I_2) + K_{pcb} I_3 - \gamma I_2 + 0.002(K_{pcf} C_4 - 4\beta I_2) \quad (15)$$

$$\frac{dI_3}{dt} = 0.001(K_{pcf} I_1 - \alpha I_3) + \gamma I_2 - K_{pcb} I_3 + \gamma K_{pcf} C_4 - 4\beta K_{pcb} I_3 \quad (16)$$

*T*-type  $\text{Ca}^{2+}$  Current.

$$I_{CaT} = G_{CaT} b g (V - E_{Ca} + 75) \quad (17)$$

$$b_\infty = \left\{ 1 + \exp[-(V + 23)/6.1] \right\}^{-1} \quad (18)$$

$$\tau_b = 0.6 + 5.4 \times \{1 + \exp[0.03(V + 100)]\}^{-1} \quad (19)$$

$$g_\infty = \{1 + \exp[(V + 75)/6.6]\}^{-1} \quad (20)$$

$$\tau_g = 1 + 40 \times \{1 + \exp[0.08(V + 65)]\}^{-1} \quad (21)$$

$$\frac{db}{dt} = \frac{b_\infty - b}{\tau_b} \quad (22)$$

$$\frac{dg}{dt} = \frac{g_\infty - g}{\tau_g} \quad (23)$$

Background  $\text{Ca}^{2+}$  Current.

$$I_{Cab} = G_{Cab}(V - E_{Ca}) \quad (24)$$

Fast  $\text{Na}^+$  Current.

$$I_{Na} = G_{Na}O_{Na}(V - E_{Naf}) \quad (25)$$

$$E_{Naf} = \frac{RT}{F} \ln \left( \frac{0.9[\text{Na}^+]_o + 0.1[\text{K}^+]_o}{0.9[\text{Na}^+]_i + 0.1[\text{K}^+]_i} \right) \quad (26)$$

$$\alpha_{Na11} = 3.802 / \{0.1027 \exp[-(V + 2.5)/17] + 0.20 \exp[-(V + 2.5)/150]\} \quad (27)$$

$$\alpha_{Na12} = 3.802 / \{0.1027 \exp[-(V + 2.5)/15] + 0.23 \exp[-(V + 2.5)/150]\} \quad (28)$$

$$\alpha_{Na13} = 3.802 / \{0.1027 \exp[-(V + 2.5)/12] + 0.25 \exp[-(V + 2.5)/150]\} \quad (29)$$

$$\beta_{Na11} = 0.1917 \exp[-(V + 2.5)/20.3] \quad (30)$$

$$\beta_{Na12} = 0.20 \exp[-(V - 2.5)/20.3] \quad (31)$$

$$\beta_{Na13} = 0.22 \exp[-(V - 7.5)/20.3] \quad (32)$$

$$\alpha_{Na3} = \beta_{Na4} = 7 \times 10^{-7} \exp[-(V + 7)/7.7] \quad (33)$$

$$\beta_{Na3} = 0.0084 + 0.00002(V + 7) \quad (34)$$

$$\alpha_{Na2} = \{0.1885 \exp[-(V + 7)/16.6] + 0.3940\}^{-1} \quad (35)$$

$$\beta_{Na2} = \alpha_{Na13} \alpha_{Na2} \alpha_{Na3} / (\beta_{Na13} \beta_{Na3}) \quad (36)$$

$$\alpha_{Na4} = \alpha_{Na2} / 1000 \quad (37)$$

$$\alpha_{Na5} = \alpha_{Na2} / 95000 \quad (38)$$

$$\beta_{Na5} = \alpha_{Na3} / 50 \quad (39)$$

$$C_{Na3} = 1 - (O_{Na} + C_{Na1} + C_{Na2} + IF_{Na} + I1_{Na} + I2_{Na} + IC_{Na2} + IC_{Na3}) \quad (40)$$

$$\frac{dC_{Na2}}{dt} = \alpha_{Na11} C_{Na3} - \beta_{Na11} C_{Na2} + \beta_{Na12} C_{Na1} - \alpha_{Na12} C_{Na2} + \alpha_{Na3} IC_{Na2} - \beta_{Na3} C_{Na2} \quad (41)$$

$$\frac{dC_{Na1}}{dt} = \alpha_{Na12}C_{Na2} - \beta_{Na12}C_{Na1} + \beta_{Na13}O_{Na} - \alpha_{Na13}C_{Na1} + \alpha_{Na3}IF_{Na} - \beta_{Na3}C_{Na1} \quad (42)$$

$$\frac{dO_{Na}}{dt} = \alpha_{Na13}C_{Na1} - \beta_{Na13}O_{Na} + \beta_{Na2}IF_{Na} - \alpha_{Na2}O_{Na} \quad (43)$$

$$\frac{dIF_{Na}}{dt} = \alpha_{Na2}O_{Na} - \beta_{Na2}IF_{Na} + \beta_{Na3}C_{Na1} - \alpha_{Na3}IF_{Na} + \beta_{Na4}I1_{Na} - \alpha_{Na4}IF_{Na} + \alpha_{Na12}IC_{Na2} - \beta_{Na12}IF_{Na} \quad (44)$$

$$\frac{dI1_{Na}}{dt} = \alpha_{Na4}IF_{Na} - \beta_{Na4}I1_{Na} + \beta_{Na5}I2_{Na} - \alpha_{Na5}I1_{Na} \quad (45)$$

$$\frac{dI2_{Na}}{dt} = \alpha_{Na5}I1_{Na} - \beta_{Na5}I2_{Na} \quad (46)$$

$$\frac{dIC_{Na2}}{dt} = \alpha_{Na11}IC_{Na3} - \beta_{Na11}IC_{Na2} + \beta_{Na12}IF_{Na} - \alpha_{Na12}IC_{Na2} + \beta_{Na3}C_{Na2} - \alpha_{Na3}IC_{Na2} \quad (47)$$

$$\frac{dIC_{Na3}}{dt} = \beta_{Na11}IC_{Na2} - \alpha_{Na11}IC_{Na3} + \beta_{Na3}C_{Na3} - \alpha_{Na3}IC_{Na3} \quad (48)$$

Delayed Rectifier K<sup>+</sup> Current.

$$I_{Kdr} = I_{Kx}K_{Kdr}[K^+]_o^{0.59} \left[ [K^+]_i - [K^+]_o \exp\left(-\frac{VF}{RT}\right) \right] \quad (49)$$

$$I_{Kx\infty} = \left\{ 1 + \exp\left[-(V + 25.1)/7.4\right] \right\}^{-1} \quad (50)$$

$$\tau_{IKx} = 2000 / \left[ 17 \exp(0.0398V) + 0.211 \exp(-0.051V) \right] \quad (51)$$

$$\frac{dI_{Kx}}{dt} = \frac{I_{Kx\infty} - I_{Kx}}{\tau_{IKx}} \quad (52)$$

Time Independent K<sup>+</sup> Current.

$$I_{K1} = K_{K1}[K^+]_o^{0.37} \left[ [K^+]_i - [K^+]_o \exp\left(-\frac{VF}{RT}\right) \right] \quad (53)$$

Hyperpolarization Activated Current.

$$I_{fNa} = 0.2G_f y (V - E_{Na}) \quad (54)$$

$$I_{fK} = 0.8G_f y (V - E_K) \quad (55)$$

$$I_f = I_{fNa} + I_{fK} \quad (56)$$

$$y_\infty = \left\{ 1 + \exp\left[(V + 70.7742)/11.9531\right] \right\}^{-1} \quad (57)$$

$$\tau_y = 65.88 + 7429 \exp[V/16.86] \quad (58)$$

$$\frac{dy}{dt} = \frac{y_\infty - y}{\tau_y} \quad (59)$$

NaK-ATPase.

$$I_{NaK} = I_{NaK}^{\max} f_{NaK} \times \left[ 1 + \left( K_{m,Na} / [Na^+]_i \right)^{n_{NaK}} \right]^{-1} \times \left[ 1 + \left( K_{m,Ko} / [K^+]_o \right) \right]^{-1} \quad (60)$$

$$f_{NaK} = [1 + 0.1245 \exp(-0.1VF/RT) + 0.0365\sigma \exp(-VF/RT)]^{-1} \quad (61)$$

$$\sigma = 1/7 \times [\exp([Na^+]_o/67300) - 1] \quad (62)$$

$$\text{Na}^+/\text{Ca}^{2+}\text{-Exchanger.} \quad I_{NCX} = k_{NCX} \frac{[Na^+]_o^3}{K_{m,Na}^3 + [Na^+]_o^3} \frac{[Ca^{2+}]_o}{K_{m,Ca} + [Ca^{2+}]_o} \frac{[Na^+]_i^3 \exp[\eta VF/RT] - [Ca^{2+}]_i \exp[(\eta-1)VF/RT]}{[Na^+]_o^3} \frac{1}{1 + k_{sat} \exp[(\eta-1)VF/RT]} \quad (63)$$

$$\frac{dV}{dt} = -(I_{NCX} + I_{CaL} + I_{CaT} + I_{Cab} + I_{Kdr} + I_{K1} + I_{NaK} + I_{Na} + I_f + I_{stim}) \quad (64)$$

SR

Ryanodine Receptors.

$$J_{RyR} = v_1 (P_{O1} + P_{O2}) ([Ca^{2+}]_{SR} - [Ca^{2+}]_{subSR}) \quad (65)$$

$$J_{RyR\text{-caffeine}} = v_1 \times 0.2 \times ([Ca^{2+}]_{SR} - [Ca^{2+}]_{subSR}) \quad (66)$$

$$P_{C1} = 1 - (P_{C2} + P_{O1} + P_{O2}) \quad (67)$$

$$\frac{dP_{O1}}{dt} = k_a^+ [Ca^{2+}]_{subSR}^n P_{C1} - k_a^- P_{O1} - k_b^+ [Ca^{2+}]_{subSR}^m P_{O1} + k_b^- P_{O2} - k_c^+ P_{O1} + k_c^- P_{C2} \quad (68)$$

$$\frac{dP_{O2}}{dt} = k_b^+ [Ca^{2+}]_{subSR}^m P_{O1} - k_b^- P_{O2} \quad (69)$$

$$\frac{dP_{C2}}{dt} = k_c^+ P_{O1} - k_c^- P_{C2} \quad (70)$$

IP<sub>3</sub> Receptors.

$$J_{IP3} = k_f (0.1O_{IP3} + 0.9A_{IP3})^4 ([Ca^{2+}]_{SR} - [Ca^{2+}]_{subSR}) \quad (71)$$

$$\phi_1 = \frac{(k_1 L_1 + l_2) [Ca^{2+}]_{subSR}}{L_1 + [Ca^{2+}]_{subSR} (1 + L_1/L_3)} \quad (72)$$

$$\phi_2 = \frac{k_2 L_3 + l_4 [Ca^{2+}]_{subSR}}{L_3 + [Ca^{2+}]_{subSR} (1 + L_3/L_1)} \quad (73)$$

$$\phi_{-2} = \frac{k_{-2} + l_{-4} [Ca^{2+}]_{subSR}}{1 + [Ca^{2+}]_{subSR}/L_5} \quad (74)$$

$$\phi_3 = \frac{k_3 L_5}{L_5 + [Ca^{2+}]_{subSR}} \quad (75)$$

$$\phi_4 = \frac{(k_4 L_5 + l_6) [Ca^{2+}]_{subSR}}{L_5 + [Ca^{2+}]_{subSR}} \quad (76)$$

$$\phi_{-4} = \frac{L_1(k_{-4} + L_{-6})}{L_1 + [\text{Ca}^{2+}]_{\text{subSR}}} \quad (77)$$

$$\phi_5 = \frac{(k_1 L_1 + l_2)[\text{Ca}^{2+}]_{\text{subSR}}}{L_1 + [\text{Ca}^{2+}]_{\text{subSR}}} \quad (78)$$

$$S_{IP3} = 1 - (R_{IP3} + O_{IP3} + A_{IP3} + I1_{IP3} + I2_{IP3}) \quad (79)$$

$$\frac{dR_{IP3}}{dt} = \phi_{-2}O_{IP3} - \phi_2 pR_{IP3} + (k_{-1} + L_{-2})I1_{IP3} - \phi_1 R_{IP3} \quad (80)$$

$$\frac{dO_{IP3}}{dt} = \phi_2 pR_{IP3} - (\phi_{-2} + \phi_4 + \phi_3)O_{IP3} + \phi_{-4}A_{IP3} + k_{-3}S_{IP3} \quad (81)$$

$$\frac{dA_{IP3}}{dt} = \phi_4 O_{IP3} - \phi_{-4}A_{IP3} - \phi_5 A_{IP3} + (k_{-1} + L_{-2})I2_{IP3} \quad (82)$$

$$\frac{dI1_{IP3}}{dt} = \phi_1 R_{IP3} - (k_{-1} + L_{-2})I1_{IP3} \quad (83)$$

$$\frac{dI2_{IP3}}{dt} = \phi_5 A_{IP3} - (k_{-1} + L_{-2})I2_{IP3} \quad (84)$$

SERCA.

$$J_{up} = v_2 / \left[ 1 + \left( K_{m,up} / [\text{Ca}^{2+}]_{\text{subSR}} \right)^2 \right] \quad (85)$$

Ca<sup>2+</sup> Concentration in SR.

$$\beta_{SR} = \left[ 1 + [\text{CLRT}]_{\text{tot}} K_{m\text{CLRT}} / \left( [\text{Ca}^{2+}]_{\text{SR}} + K_{m\text{CLRT}} \right)^2 \right]^{-1} \quad (86)$$

$$\frac{d[\text{Ca}^{2+}]_{\text{SR}}}{dt} = \beta_{SR} \left( -J_{RyR} - J_{IP3} + J_{up} \right) / V_{SR} \quad (87)$$

$$V_{SR} = \frac{4}{3} \pi \left( r_{SR}^3 - r_{nucleus}^3 \right) \times 10^{-3} \text{ pl/fl} \quad (88)$$

Cytosol

Capacitive Membrane Area.

$$A_{cap} = 4\pi r_{SL}^2 \times 10^{-8} \text{ cm}^2 / \text{i m}^2 \quad (89)$$

Cytosol Volume.

$$V_{myo} = \frac{4}{3} \pi \left( r_{SL}^3 - r_{SR}^3 \right) \times 10^{-3} \text{ pl/fl} \quad (90)$$

Na<sup>+</sup> Concentration

$$\frac{d[\text{Na}^+]_i}{dt} = - \left( I_{Na} + 3I_{NCX} + 3I_{NaK} + I_{fNa} \right) \frac{A_{cap} C_m}{FV_{cyto} \times 10^{-6} \text{ i l/pl}} \quad (91)$$

K<sup>+</sup> Concentration

$$\frac{d[\text{K}^+]_i}{dt} = - \left( I_{Kdr} + I_{K1} + I_{JK} - 2I_{NaK} + I_{stim} \right) \frac{A_{cap} C_m}{FV_{cyto} \times 10^{-6} \text{ i l/pl}} \quad (92)$$

## Ca<sup>2+</sup> Concentration

In the following equations  $c = [\text{Ca}^{2+}]_i$ . The general equation for Ca<sup>2+</sup> diffusion in spherical coordinates with radial symmetry is

$$\frac{\partial c(r,t)}{\partial t} = D_{Ca} \frac{\partial^2 c(r,t)}{\partial r^2} + \frac{2D_{Ca}}{r} \frac{\partial c(r,t)}{\partial r} + J_{Ca}(r,t). \quad (93)$$

We calculate the radial derivatives with steps length of  $\Delta r$ , i.e., the cytosol is divided to spherical cores with thickness of  $\Delta r$ . For calculating the concentrations at the centers of these spherical cores we define a vector

$$\mathbf{j} = [r_{SR} + 0.5\Delta r \quad r_{SR} + 0.5\Delta r + \Delta r \quad r_{SR} + 0.5\Delta r + 2\Delta r \quad \dots \quad r_{SL} - 0.5\Delta r] / \Delta r. \quad (94)$$

Thus,  $j_n \Delta r$  is the spatial coordinate for concentration  $c_n$ . With the reflecting boundary conditions at  $r_{SL}$  and  $r_{SR}$  and with SR and SL Ca<sup>2+</sup> fluxes we obtain for the change in total (free + buffered) Ca<sup>2+</sup> for  $n = 1$

$$\frac{dc_n}{dt} = \frac{D_{Ca}}{j_n (\Delta r)^2} [(1 + j_n)c_{n+1} - 2j_n c_n + (j_n - 1)c_n] + \frac{J_{CaSR}}{V_{subSR}} \quad (95)$$

for  $n = 2, 3, 4, \dots, a-1$

$$\frac{dc_n}{dt} = \frac{D_{Ca}}{j_n (\Delta r)^2} [(1 + j_n)c_{n+1} - 2j_n c_n + (j_n - 1)c_{n-1}] \quad (96)$$

for  $n = a$

$$\frac{dc_n}{dt} = \frac{D_{Ca}}{j_n (\Delta r)^2} [(1 + j_n)c_n - 2j_n c_n + (j_n - 1)c_{n-1}] + \frac{J_{CaSL}}{V_{subSL}}, \quad (97)$$

where  $a$  is the number of components in the vector  $\mathbf{j}$  and

$$J_{CaSR} = J_{RyR} + J_{IP3} - J_{up} \quad (98)$$

$$J_{CaSL} = (2I_{NCX} - I_{CaL} - I_{CaT} - I_{Cab}) \frac{A_{cap} C_m}{2F \times 10^{-6} \text{ i l/pl}} \quad (99)$$

$$V_{subSR} = \left[ \frac{4}{3} \pi (r_{SR} + \Delta r)^3 - \frac{4}{3} \pi r_{SR}^3 \right] \times 10^{-3} \text{ pl/fl} \quad (100)$$

$$V_{subSL} = \left[ \frac{4}{3} \pi r_{SL}^3 - \frac{4}{3} \pi (r_{SL} - \Delta r)^3 \right] \times 10^{-3} \text{ pl/fl}. \quad (101)$$

The new value for each  $c_n$  ( $c_{n-new}$ ) at each time-step ( $\Delta t$ ) is computed as described in Hund and Rudy (2004):

$$c_{n-new} = \frac{2}{3} \sqrt{b^2 - 3c} \cos \left[ \frac{1}{3} \cos^{-1} \left( \frac{9bc - 2b^3 - 27d}{2(b^2 - 3c)^{1.5}} \right) \right] - \frac{b}{3}, \quad (102)$$

where

$$b = [\text{CMDN}]_{\text{tot}} + [\text{TRPN}]_{\text{tot}} - c_{\text{total-new}} + K_{m,\text{CMDN}} + K_{m,\text{TRPN}} \quad (103)$$

$$c = K_{m,\text{CMDN}} K_{m,\text{TRPN}} - c_{\text{total-new}} (K_{m,\text{CMDN}} + K_{m,\text{TRPN}}) + [\text{TRPN}]_{\text{tot}} K_{m,\text{CMDN}} + [\text{CMDN}]_{\text{tot}} K_{m,\text{TRPN}} \quad (104)$$

$$d = -K_{m,\text{TRPN}} K_{m,\text{CMDN}} c_{\text{total-new}} \quad (105)$$

$$c_{\text{total-new}} \approx \text{CMDN} + \text{TRPN} + c_n + \frac{dc_n}{dt} \Delta t \quad (106)$$

$$\text{TRPN} = [\text{TRPN}]_{\text{tot}} / (1 + K_{m,\text{TRPN}} / c_n) \quad (107)$$

$$\text{CMDN} = [\text{CMDN}]_{\text{tot}} / \left(1 + K_{m,\text{CMDN}} / c_n\right) \quad (108)$$

## REFERENCES

Hund, T.J., and Y. Rudy. 2004. Rate dependence and regulation of action potential and calcium transient in a canine cardiac ventricular cell model. *Circulation*. 110:3168–3174.

**Table S1. Solutions (in mM) for the Electrophysiological Recordings**

| Target                | Bath solution                                                                                                                                        | Pipette solution                                                                                                                                                                        | Recording method                                                                                                                                                                                                                                                                                                                                                                                                                                                                                                              |
|-----------------------|------------------------------------------------------------------------------------------------------------------------------------------------------|-----------------------------------------------------------------------------------------------------------------------------------------------------------------------------------------|-------------------------------------------------------------------------------------------------------------------------------------------------------------------------------------------------------------------------------------------------------------------------------------------------------------------------------------------------------------------------------------------------------------------------------------------------------------------------------------------------------------------------------|
| $I_{NCX}$             | NaCl 140, CaCl <sub>2</sub> 1, MgCl <sub>2</sub> 1, HEPES 10, glucose 10, nifedipine 0.01, niflumic acid 0.01, pH 7.40 (Tris) + NiCl <sub>2</sub> 10 | NaCl 10, CsCl 20, CsOH 80, glutamic acid 80, TEA-CI 20, HEPES 10, Tris-ATP 5, MgCl <sub>2</sub> 5.7, BAPTA 5, CaCl <sub>2</sub> 2.69 (=> 200 nM free Ca <sup>2+</sup> ), pH 7.20 (CsOH) | Measured as Ni <sup>2+</sup> -sensitive current using voltage ramp from +100 to -100 mV. The solutions and the protocol were as described previously. <sup>a</sup>                                                                                                                                                                                                                                                                                                                                                            |
| $I_{Na}$              | NaCl 140, TEA-CI 140, NiCl <sub>2</sub> 1, MgCl <sub>2</sub> 2, HEPES 10, glucose 10, pH 7.40 (TEA-OH)                                               | Cs-methanesulfonate 120, TEA-CI 10, EGTA 10, Na <sub>2</sub> -phosphocreatine 5, Mg-ATP 1, Na-GTP 1, HEPES 10, pH 7.20 (CsOH)                                                           | Measured using -100 mV holding potential and voltage clamps ranging from -70 to +70 mV with 10-mV steps.                                                                                                                                                                                                                                                                                                                                                                                                                      |
| $I_{Kdr}$             | NMDG 140, KCl 5.4, MgCl <sub>2</sub> 0.5, CaCl <sub>2</sub> 1, HEPES 10, glucose 10, nifedipine 0.01, pH 7.40 (HCl).                                 | KCl 80, K-aspartic acid 60, Na <sub>2</sub> -phosphocreatine 5, Mg-ATP 5, CaCl <sub>2</sub> 0.65, EGTA 10, HEPES 5, pH 7.20 (KOH)                                                       | Measured using -40 mV holding potential and voltage clamps ranging from -30 to +40 mV with 10-mV steps.                                                                                                                                                                                                                                                                                                                                                                                                                       |
| $I_{K1}$              | NaCl 137, KCl 5.4, MgCl 0.5, CaCl <sub>2</sub> 1, HEPES 11.8, glucose 10, pH 7.40 (NaOH) + BaCl <sub>2</sub> 2                                       | KCl 80, K-aspartic acid 60, Na <sub>2</sub> -phosphocreatine 5, Mg-ATP 5, CaCl <sub>2</sub> 0.65, EGTA 10, HEPES 5, pH 7.20 (KOH)                                                       | Measured as the Ba <sup>2+</sup> sensitive current using -50 mV holding potential and voltage clamps ranging from -60 to -110 mV with 10-mV steps. $I_{K1}$ was defined as the initial current at the beginning of the voltage clamp when the $I_f$ has not yet activated.                                                                                                                                                                                                                                                    |
| $I_f$                 | NaCl 137, KCl 5.4, MgCl 0.5, CaCl <sub>2</sub> 1, HEPES 11.8, glucose 10, BaCl <sub>2</sub> 2, NiCl <sub>2</sub> 2, 4-AP 0.5, pH 7.40 (NaOH)         | KCl 80, K-aspartic acid 60, Na <sub>2</sub> -phosphocreatine 5, Mg-ATP 5, CaCl <sub>2</sub> 0.65, EGTA 10, HEPES 5, pH 7.20 (KOH)                                                       | Measured using 0 mV holding potential and voltage clamps ranging from -50 to -120 mV with 10-mV steps. $I_f$ was defined as the difference between the initial current at the beginning of the voltage clamp and the current at the end of the voltage clamp. The solutions and the protocol were based on the work of Yasui et al. <sup>b</sup>                                                                                                                                                                              |
| $I_{CaL}$ , $I_{CaT}$ | TEA-CI 140, CaCl <sub>2</sub> 1, MgCl <sub>2</sub> 2, HEPES 10, glucose 10, pH 7.40 (TEA-OH)                                                         | Cs-methanesulfonate 120, TEA-CI 10, EGTA 10, Na <sub>2</sub> -phosphocreatine 5, Mg-ATP 1, Na-GTP 1, HEPES 10, pH 7.2 (CsOH)                                                            | Ca <sup>2+</sup> currents were measured using -40 and -100 mV holding potentials and voltage clamps ranging from -30 to +40 mV and from -50 to +40 mV with 10-mV steps. The current measured from -40 mV holding potential was defined as the L-type Ca <sup>2+</sup> current. The T-type current was defined as the difference between current measured from -100 and -40 mV holding potential to a same test potential. <sup>c</sup> The solutions and the protocol were modified from the work of Yang et al. <sup>d</sup> |

<sup>a</sup>Despa, S., F. Brette, C.H. Orchard, and D.M. Bers. 2003. Na/Ca exchange and Na/K-ATPase function are equally concentrated in transverse tubules of rat ventricular myocytes. *Biophys. J.* 85:3388–3396.

<sup>b</sup>Yasui, K., W. Liu, T. Opthof, K. Kada, J.K. Lee, K. Kamiya, and I. Kodama. 2001. I-f current and spontaneous activity in mouse embryonic ventricular myocytes. *Circ. Res.* 88:536–542.

<sup>c</sup>Niwa, N., K. Yasui, T. Opthof, H. Takemura, A. Shimizu, M. Horiba, J.K. Lee, H. Honjo, K. Kamiya, and I. Kodama. 2004. Ca(v)3.2 subunit underlies the functional T-type Ca<sup>2+</sup> channel in murine hearts during the embryonic period. *Am. J. Physiol. Heart Circ. Physiol.* 286:H2257–H2263.

<sup>d</sup>Yang, Z., W. Shen, J.N. Rottman, J.P. Wikswo, and K.T. Murray. 2005. Rapid stimulation causes electrical remodeling in cultured atrial myocytes. *J. Mol. Cell. Cardiol.* 38:299–308.



**Table S2. Structural and Environmental Parameters of the Model**

| Parameter            | Definition                                   | Value                           |
|----------------------|----------------------------------------------|---------------------------------|
| $r_{\text{nucleus}}$ | Radius to the surface of nucleus             | 7.415 $\mu\text{m}^{\text{a}}$  |
| $r_{\text{SR}}$      | Radius to the surface of SR                  | 7.45 $\mu\text{m}^{\text{a}}$   |
| $r_{\text{SL}}$      | Radius of the cell                           | 11.05 $\mu\text{m}^{\text{a}}$  |
| $F$                  | Faradays constant                            | 96.5 C/mmol                     |
| $T$                  | Temperature                                  | 34 °C = 307 K <sup>a</sup>      |
| $R$                  | Ideal gas constant                           | 8.314 J / (mol K)               |
| $C_m$                | Specific membrane capacitance                | 1.0 $\mu\text{F}/\text{cm}^2$   |
| $[\text{Ca}^{2+}]_o$ | Extracellular $\text{Ca}^{2+}$ concentration | 1796 $\mu\text{M}^{\text{a}}$   |
| $[\text{Na}^+]_o$    | Extracellular $\text{Na}^+$ concentration    | 154578 $\mu\text{M}^{\text{a}}$ |
| $[\text{K}^+]_o$     | Extracellular $\text{K}^+$ concentration     | 5366 $\mu\text{M}^{\text{a}}$   |

<sup>a</sup>Fitted based on experimental data or conditions.

**Table S3. Parameters of the SL Membrane Currents**

| Parameter       | Definition                                                                      | Value                                                                     |
|-----------------|---------------------------------------------------------------------------------|---------------------------------------------------------------------------|
| $G_{CaL}$       | Maximum $I_{CaL}$ conductance                                                   | 0.1518 mS/ $\mu$ F <sup>a</sup>                                           |
| $E_{CaL}$       | Reversal potential for $I_{CaL}$                                                | 63.0 mV <sup>b</sup>                                                      |
| $K_{pc,max}$    | Maximum time constant for Ca <sup>2+</sup> induced inactivation of $I_{CaL}$    | 0.23324 ms <sup>-1b</sup>                                                 |
| $K_{pc,half}$   | Half-saturation constant for Ca <sup>2+</sup> induced inactivation of $I_{CaL}$ | 20.0 $\mu$ M <sup>b</sup>                                                 |
| $K_{pcb}$       | Rate constant for $I_{CaL}$ inactivation                                        | 0.0005 ms <sup>-1b</sup>                                                  |
| $G_{CaT}$       | Maximum $I_{CaT}$ conductance                                                   | 0.0655 mS/ $\mu$ F <sup>a</sup>                                           |
| $G_{Cab}$       | $I_{Cab}$ conductance                                                           | 0.003057 mS/ $\mu$ F <sup>a</sup>                                         |
| $G_{Na}$        | Maximum $I_{Na}$ conductance                                                    | 4.5 mS/ $\mu$ F <sup>a</sup>                                              |
| $K_{Kdr}$       | Scaling factor for $I_{Kdr}$                                                    | $2.201 \times 10^{-7}$ pA / (pF ( $\mu$ M) <sup>1.59</sup> ) <sup>a</sup> |
| $K_{K1}$        | Scaling factor for $I_{K1}$                                                     | $2.743 \times 10^{-7}$ pA / (pF ( $\mu$ M) <sup>1.37</sup> ) <sup>a</sup> |
| $G_f$           | Maximum $I_f$ conductance                                                       | 0.04836 mS/ $\mu$ F <sup>a</sup>                                          |
| $I_{NaK}^{max}$ | Maximum NaK-ATPase current                                                      | 4.698 pA/pF <sup>a</sup>                                                  |
| $K_{m,Na}$      | Na <sup>+</sup> half saturation constant for $I_{NaK}$                          | 18600 $\mu$ M <sup>a</sup>                                                |
| $n_{NaK}$       | Hill coefficient for Na <sup>+</sup> in $I_{NaK}$                               | 3.2 <sup>a</sup>                                                          |
| $K_{m,Ko}$      | K <sup>+</sup> half saturation constant for $I_{NaK}$                           | 1500 $\mu$ M <sup>c</sup>                                                 |
| $k_{NCX}$       | Scaling factor $I_{NCX}$                                                        | 4890 pA/pF <sup>a</sup>                                                   |
| $K_{m,Na}$      | Na <sup>+</sup> half saturation constant for $I_{NCX}$                          | 87500 $\mu$ M <sup>c</sup>                                                |
| $K_{m,Ca}$      | Ca <sup>2+</sup> half saturation constant for $I_{NCX}$                         | 1380 $\mu$ M <sup>c</sup>                                                 |
| $k_{sat}$       | Saturation factor for $I_{NCX}$                                                 | 0.1 <sup>c</sup>                                                          |
| $\eta$          | Voltage-dependence parameter for $I_{NCX}$                                      | 0.55752 <sup>a</sup>                                                      |

<sup>a</sup>Fitted based on experimental data.<sup>b</sup>Bondarenko, V.E., G.P. Szegedi, G.C. Bett, S.J. Kim, and R.L. Rasmusson. 2004. Computer model of action potential of mouse ventricular myocytes. *Am. J. Physiol. Heart Circ. Physiol.* 287:H1378–H1403.<sup>c</sup>Luo, C.H., and Y. Rudy. 1994. A Dynamic-model of the cardiac ventricular action-potential .1. Simulations of ionic currents and concentration changes. *Circ. Res.* 74:1071–1096.

**Table S4. Sarcoplasmic Reticulum Parameters**

| Parameter | Definition                                           | Value                                                |
|-----------|------------------------------------------------------|------------------------------------------------------|
| $v_1$     | Maximum $Ca^{2+}$ permeability for RyR               | 0.01 ms <sup>-1a</sup>                               |
| $k_a^+$   | RyR rate constant                                    | 1.5 $\mu M^{-4}$ ms <sup>-1b</sup>                   |
| $k_a^-$   | RyR rate constant                                    | 0.0288 ms <sup>-1b</sup>                             |
| $k_b^+$   | RyR rate constant                                    | 1.5 $\mu M^{-3}$ ms <sup>-1b</sup>                   |
| $k_b^-$   | RyR rate constant                                    | 0.3859 ms <sup>-1b</sup>                             |
| $k_c^+$   | RyR rate constant                                    | 0.00175 ms <sup>-1b</sup>                            |
| $k_c^-$   | RyR rate constant                                    | 0.0001 ms <sup>-1b</sup>                             |
| $n$       | RyR cooperativity parameter                          | 4 <sup>b</sup>                                       |
| $m$       | RyR cooperativity parameter                          | 3 <sup>b</sup>                                       |
| $p$       | IP <sub>3</sub> concentration                        | 0.075 $\mu M$ (unless stated otherwise) <sup>a</sup> |
| $k_f$     | Maximum $Ca^{2+}$ permeability for IP <sub>3</sub> R | 0.3 ms <sup>-1a</sup>                                |
| $k_1$     | IP <sub>3</sub> R kinetic parameter                  | 0.00064 ( $\mu M$ ms) <sup>-1c</sup>                 |
| $k_{-1}$  | IP <sub>3</sub> R kinetic parameter                  | 0.00004 (ms) <sup>-1c</sup>                          |
| $k_2$     | IP <sub>3</sub> R kinetic parameter                  | 0.0374 ( $\mu M$ ms) <sup>-1c</sup>                  |
| $k_{-2}$  | IP <sub>3</sub> R kinetic parameter                  | 0.0014 (ms) <sup>-1c</sup>                           |
| $k_3$     | IP <sub>3</sub> R kinetic parameter                  | 0.00011 ( $\mu M$ ms) <sup>-1c</sup>                 |
| $k_{-3}$  | IP <sub>3</sub> R kinetic parameter                  | 0.0298 (ms) <sup>-1c</sup>                           |
| $k_4$     | IP <sub>3</sub> R kinetic parameter                  | 0.004 ( $\mu M$ ms) <sup>-1c</sup>                   |
| $k_{-4}$  | IP <sub>3</sub> R kinetic parameter                  | 0.00054 (ms) <sup>-1c</sup>                          |
| $L_1$     | IP <sub>3</sub> R kinetic parameter                  | 0.12 $\mu M^c$                                       |
| $L_3$     | IP <sub>3</sub> R kinetic parameter                  | 0.025 $\mu M^c$                                      |
| $L_3$     | IP <sub>3</sub> R kinetic parameter                  | 0.025 $\mu M^c$                                      |
| $L_5$     | IP <sub>3</sub> R kinetic parameter                  | 54.7 $\mu M^c$                                       |

| Parameter             | Definition                                 | Value                         |
|-----------------------|--------------------------------------------|-------------------------------|
| $I_2$                 | IP <sub>3</sub> R kinetic parameter        | 0.0017 (ms) <sup>-1c</sup>    |
| $I_4$                 | IP <sub>3</sub> R kinetic parameter        | 0.0017 (μM ms) <sup>-1c</sup> |
| $I_6$                 | IP <sub>3</sub> R kinetic parameter        | 4.707 (ms) <sup>-1c</sup>     |
| $I_{-2}$              | IP <sub>3</sub> R kinetic parameter        | 0.0008 (ms) <sup>-1c</sup>    |
| $I_{-4}$              | IP <sub>3</sub> R kinetic parameter        | 0.0025 (μM ms) <sup>-1c</sup> |
| $I_{-6}$              | IP <sub>3</sub> R kinetic parameter        | 0.0114 (ms) <sup>-1c</sup>    |
| $V_2$                 | Maximum SERCA flux                         | 2 μM/ms <sup>a</sup>          |
| $K_{m,up}$            | Ca <sup>2+</sup> half-saturation for SERCA | 0.25 μM <sup>d</sup>          |
| [CLRT] <sub>tot</sub> | Total calreticulin concentration           | 7000 μM <sup>a</sup>          |
| $K_{mCLRT}$           | Half-saturation for calreticulin           | 2000 μM <sup>e</sup>          |

<sup>a</sup>Fitted based on experimental data.

<sup>b</sup>Keizer, J., and L. Levine. 1996. Ryanodine receptor adaptation and Ca<sup>2+</sup>-induced Ca<sup>2+</sup> release-dependent Ca<sup>2+</sup> oscillations. *Biophys. J.* 71:3477–3487.

<sup>c</sup>Sneyd, J., and J.F. Dufour. 2002. A dynamic model of the type-2 inositol trisphosphate receptor. *Proc. Natl. Acad. Sci. USA.* 99:2398–2403.

<sup>d</sup>Frank, K., C. Tilgmann, T.R. Shannon, D.M. Bers, and E.G. Kranias. 2000. Regulatory role of phospholamban in the efficiency of cardiac sarcoplasmic reticulum Ca<sup>2+</sup> transport. *Biochemistry (Mosc).* 39:14176–14182.

<sup>e</sup>Michalak, M.E., F. Corbett, N. Mesaeli, K. Nakamura, and M. Opas. 1999. Calreticulin: one protein, one gene, many functions. *Biochem. J.* 344:281–292.

**Table S5. Cytosol Parameters**

| Parameter                    | Definition                                  | Value                                     |
|------------------------------|---------------------------------------------|-------------------------------------------|
| $\Delta r$                   | Length of spatial discretization of cytosol | 0.1 $\mu\text{m}$                         |
| $[\text{TRPN}]_{\text{tot}}$ | Total troponin concentration                | 21 $\mu\text{M}^{\text{a,b}}$             |
| $K_{\text{mTRPN}}$           | Half-saturation for troponin                | 0.5 $\mu\text{M}^{\text{a}}$              |
| $[\text{CMDN}]_{\text{tot}}$ | Total calmodulin concentration              | 37.5 $\mu\text{M}^{\text{a,b}}$           |
| $K_{\text{mCMDN}}$           | Half-saturation for calmodulin              | 2.38 $\mu\text{M}^{\text{a}}$             |
| $D_{\text{Ca}}$              | Diffusion coefficient for $\text{Ca}^{2+}$  | 0.79 $\mu\text{m}^2/\text{ms}^{\text{c}}$ |

<sup>a</sup>Luo, C.H., and Y. Rudy. 1994. A dynamic-model of the cardiac ventricular action-potential .1. Simulations of ionic currents and concentration changes. *Circ. Res.* 74:1071–1096.

<sup>b</sup>Creazzo, T.L., J. Burch, and R.E. Godt. 2004. Calcium buffering and excitation-contraction coupling in developing avian myocardium. *Biophys. J.* 86:966–977.

<sup>c</sup>Cussler, E.L. 1997. Diffusion mass transfer in fluid systems. Cambridge University Press, Cambridge. 580 pp.
